# Supplementary material for: Increased Interleukin-36β Expression Promotes Angiogenesis in Japanese Atopic Dermatitis
Source: MDPI journal article supplement (doi:10.3390/ijms241311104), 2023-07-05
Supplement: s1 [file s1]

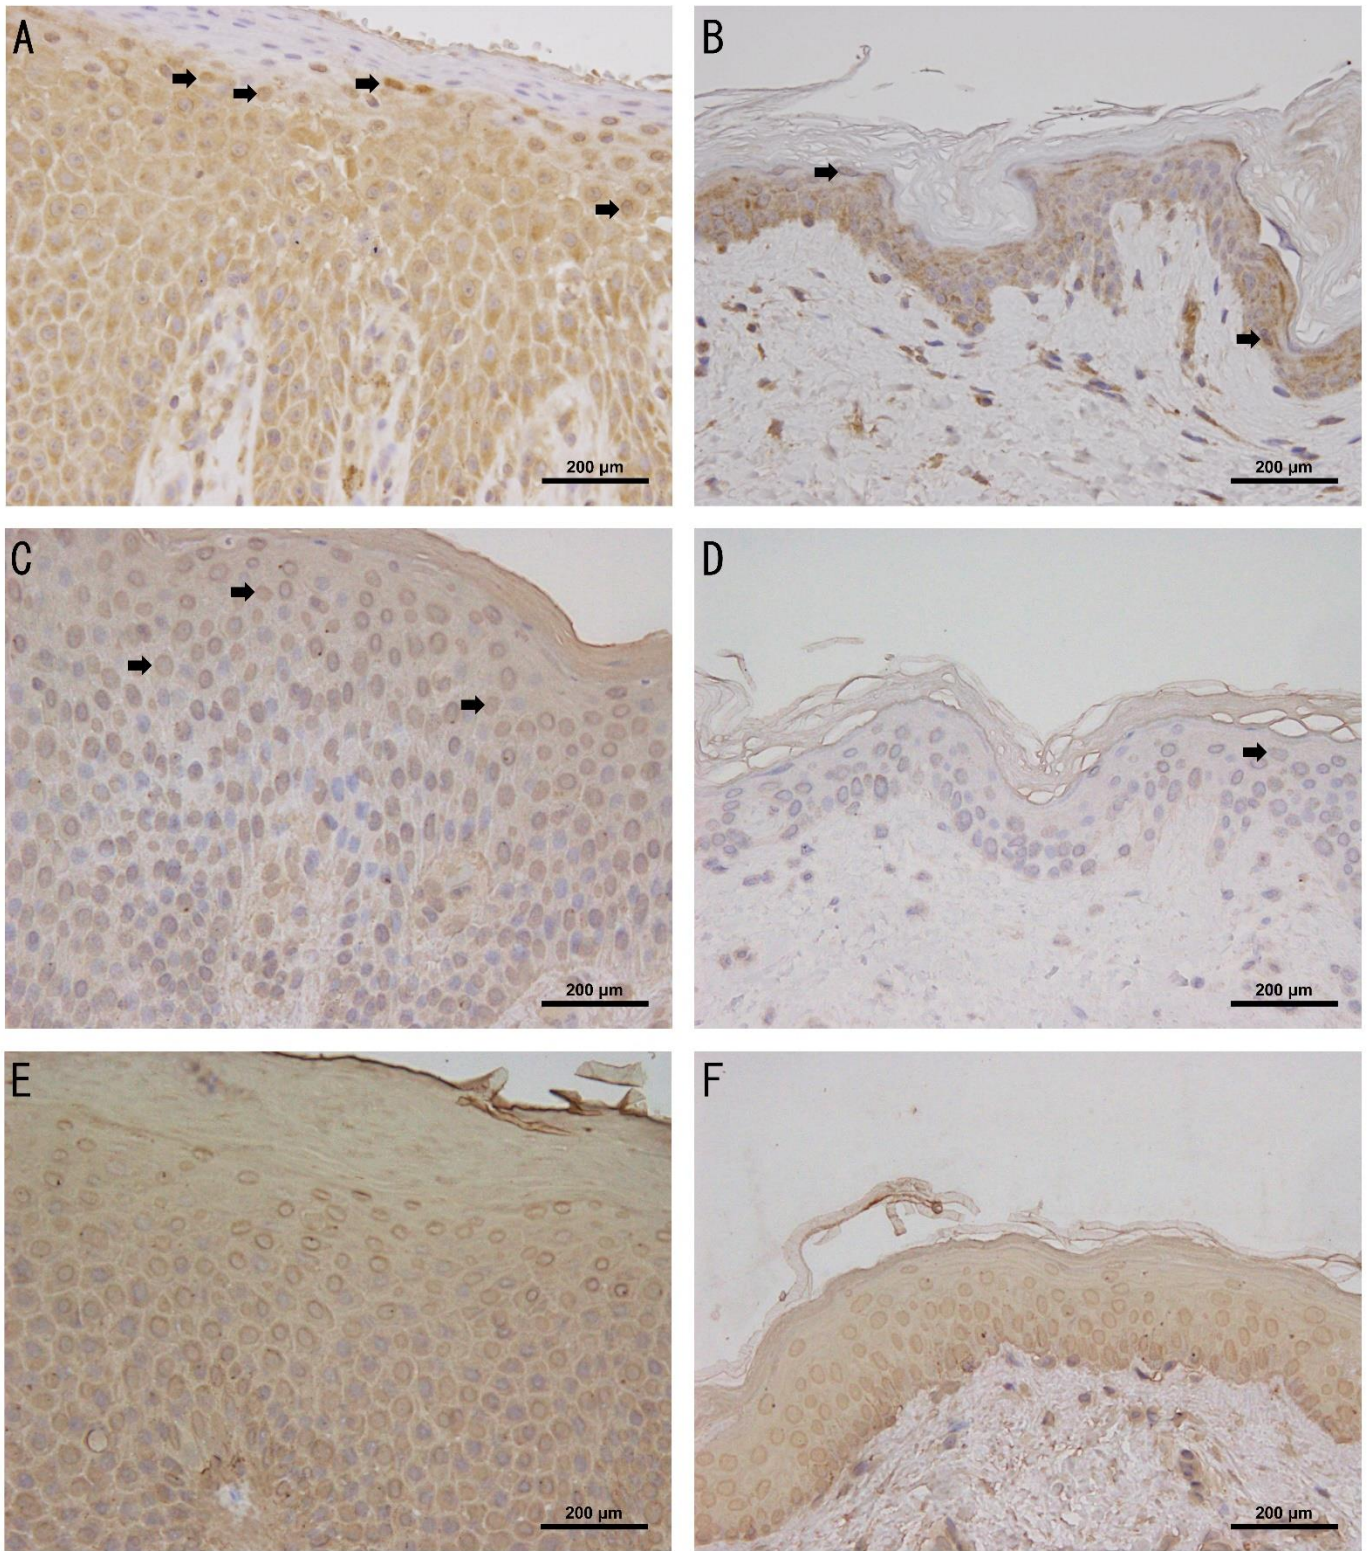

**Supplementary Figure S1.** IL-36 $\alpha$  and IL-36 $\gamma$  is overexpressed on epidermal keratinocytes in lesional skin of atopic dermatitis (AD) and IL-36 receptor (IL-36R) expression on epidermal keratinocytes was comparable between lesional skin of AD and healthy skin. (A-F) IL-36 $\alpha$  (A, B), IL-36 $\gamma$  (C, D), and IL-36R (E, F) staining in healthy skin and AD lesional skin (n = 10, respectively). Representative images of IL-36 $\alpha$ , IL-36 $\gamma$ , and IL-36R staining in AD skin (A, C, E) and in healthy skin (B, D, F) are shown (Original magnification  $\times 400$ ). Arrows point to representative keratinocytes with the nuclear staining.
